# Supplementary material
Source: publisher site journal article supplement (https://db.degruyter.com/publication/dbid/ejcro/downloadAsset/EJCRO_Entries%20Published.pdf)
Supplement: Supplementary file 1 [file EJCRO_Entries%20Published.pdf]

## Entries published in the *Encyclopedia of Jewish-Christian Relations*

- Abortion** by Rachel Mikva  
**Adam** by Adam Gregerman  
**Afterlife** by Martha Himmelfarb  
**Animals** (in Christian-Jewish Polemics) by Jay Geller  
**Anthropology** by Tyson Putthoff  
**Antiquity** by Anders Runesson  
**Antisemitism** by Nicholas de Lange  
**Apocalypse** by Lorenzo DiTommaso  
**Ark of the Covenant** by Raanan Eichler and Thomas Staubli  
**Art** (Late Antiquity, Middle Ages) by Sara Offenberg  
**Art** (modern) by Aaron Rosen and Maryanne Saunders  
**Asceticism** (Bible to Late Antiquity) by Eliezer Diamond  
**Atheism** by Daniel Langton  
**Atonement** by Christian Eberhart  
**Baptism** by Joshua Garroway  
**Bible/Canon** by Jens Schröter  
**Binitarianism** by Lieve M. Teugels  
**Birth** by Claudia D. Bergmann  
**Bread** by Jonathan Brumberg-Kraus  
**Cain & Abel** by Daniel Vorpahl  
**Calendar** by Joshua Burns  
**Charity in Antiquity** by Gregg Gardner  
**Christian Hebraism** by Deborah L. Goodwin  
**Conservative Judaism** by Elliot Dorff  
**Covenant** by Philip A. Cunningham and Adam Gregerman  
**Creation** by Michael Trainor  
**Dead Sea Scrolls** by George J. Brooke  
**Decalogue** by Cornelis de Vos  
**Demons in Antiquity** by Hector M. Patmore  
**Economics (medieval)** by Giacomo Todeschini  
**Election** by Joel S. Kaminsky and Joel N. Lohr  
**Enlightenment** by Paul Mendes-Flohr  
**Enoch** by Matthew Goff  
**Esau** by Gerhard Langer  
**Eschatology** by Richard Landes  
**Ethics** by Christian Danz  
**Eve** by Beate Ego  
**Evolution** by Daniel R. Langton  
**Exile** by Deana Klepper  
**Family** by Eyal Levinson  
**Feminism** by Katharina von Kellenbach  
**Fundamentalism** by Christina von Braun  
**Genealogy** by Helga Völkening

**Grace** by Kendall Soulen  
**Guilt and Repentance** by Katharina von Kellenbach  
**Hagar** by Brigitte Kahl  
**Heaven** by Shmuel Shepkaru  
**Holiness** by Marcel Poorthuis  
**Hymnody and Poetry** by Laura Suzanne Lieber  
**Idolatry** by Ronen Pinkas  
**Imago Dei** by Yechiel Michael Barilan  
**Israel** by Kendall Soulen  
**Jerusalem** by David Neuhaus SJ  
**Jonah** by Daniel Vorpahl  
**Joseph** by Alan T. Levenson  
**Judas** by Bruce Chilton  
**Judeoconvertos** by Renée Levine Melammed  
**Kabbalah** by Gerold Necker  
**Letters** by Lutz Doering  
**Liturgy, Ritual, Worship** by Ruth Langer and Clemens Leonhard  
**Logos** by Maren R. Niehoff  
**Maccabees** by Erich Gruen  
**Marriage** by Michael L. Satlow  
**Martyrdom** by Shira Lander  
**Mary** by Kati Ihnat  
**Masculinity** by Eyal Levinson  
**Material Culture** by Eric C. Smith  
**Migration (Antiquity to the Middle Ages)** by Michael Borgolte  
**Miriam** by Wil Gafney  
**Mission** by Edward Kessler  
**Modern Roman Catholicism** by John T. Pawlikowski  
**Modernity** by René Buchholz  
**Moses** by Christoph Dohmen  
**Music** by Jascha Nemtsov  
**North America** by Yaakov Ariel  
**Passion Play** by David J. Fine  
**Passover and Easter** by Mary C. Boys and Shuly Rubin Schwartz  
**Philosemitism** by David Fox Sandmel  
**Polemics (Christian-Jewish)** by Anna Sapir Abulafia  
**Prayer** by Amy-Jill Levine  
**Prophecy** by Rüdiger Liwak  
**Prostitution** by Tali Artman  
**Psalms** by Susan Gillingham  
**Rabbinic Literature** by Günter Stemberger  
**Rebecca** by Chontel Syfox  
**Reconciliation** by Jesper Svartvik  
**Redemption/ Salvation** by Gregor Maria Hoff  
**Reformation** by Dean Bell  
**Renaissance** by Fabrizio Lelli

**Resurrection** by Casey D. Elledge  
**Revelation** by Mary Doak  
**Sabbath** by Gerard Rouwhorst  
**Sacred Rocks (Jerusalem)** by Naomi Koltun-Fromm  
**Sacrifice** by Daniel Ullucci  
**Sarah** by Esther M. Menn  
**Second Vatican Council** by Philip A. Cunningham  
**Seelisberg** by Verena Lenzen  
**Sepharad** by Jonathan Ray  
**Sex and Sexuality in Antiquity** by William Loader  
**Slavery** by Bernadette Brooten  
**Spain** by Brian A. Catlos  
**Spirit** by Etienne Vetö  
**State of Israel and Church Institutions** by Shimon Shetreet  
**Supersession** by R. Kendall Soulen  
**Synagogue** by Ruth Langer  
**Torah (Early Reception)** by Catherine Hezser  
**Translation** by Leonard Greenspoon  
**Trinity** by Ellen T. Charry  
**Wine** by Andreas Lehnardt

Last update: 11/2023
